# Supplementary material for: Downregulation of miR-499a-5p Predicts a Poor Prognosis of Patients With Non-Small Cell Lung Cancer and Restrains the Tumorigenesis by Targeting Fibroblast Growth Factor 9
Source: PubMed Central journal article supplement — Technol Cancer Res Treat. 2020 Sep 4;19:1533033820957001. doi: 10.1177/1533033820957001 (PMC7785996; doi:10.1177/1533033820957001), 2020-09-04
Supplement: Supporting_Information.pdf [file Supporting_Information.pdf]

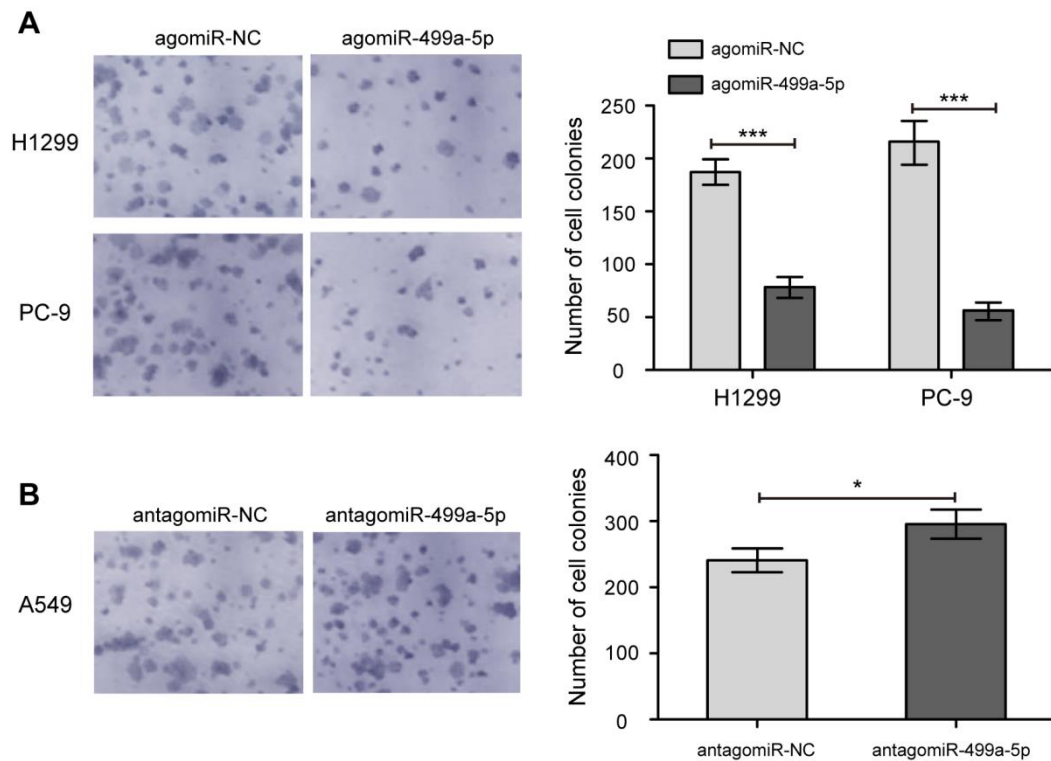

**Figure S1.** miR-499a-5p suppresses NSCLC cell colony formation. (A) Colony formation assay was used to detect cell proliferation capacity of H1299 and PC-9 cells after transfection of agomiR-499a-5p. (B) The antagomiR-499a-5p increased colony formation of A549 cells compared to antagomiR-NC-transfected cells. \* $P < 0.05$ , \*\*\* $P < 0.001$ .

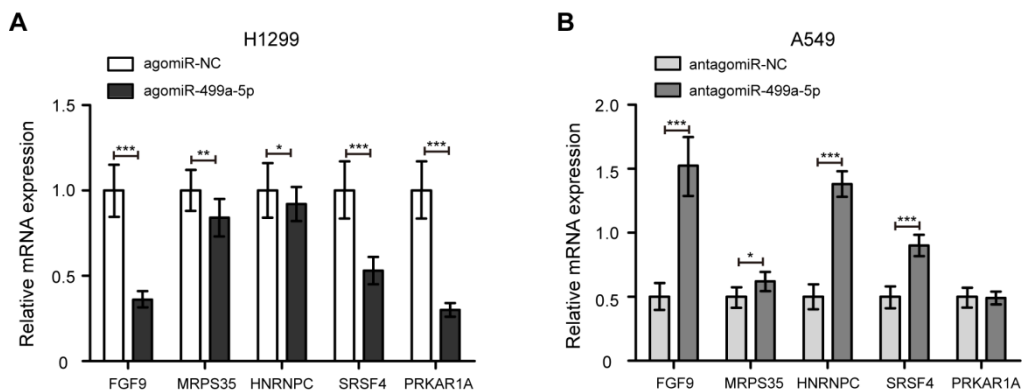

**Figure S2.** The potential target genes of miR-499a-5p in NSCLC cells. (A) RT-qPCR analysis of FGF9, MRPS35, HNRNPC, SRSF4, PRKAR1A mRNA expression in H1299 cells after transfection of agomiR-499a-5p. (B) FGF9 mRNA expression was upregulated the most by antagomiR-499a-5p in A549 cells. \* $P < 0.05$ , \*\* $P < 0.01$ , \*\*\* $P < 0.001$ .

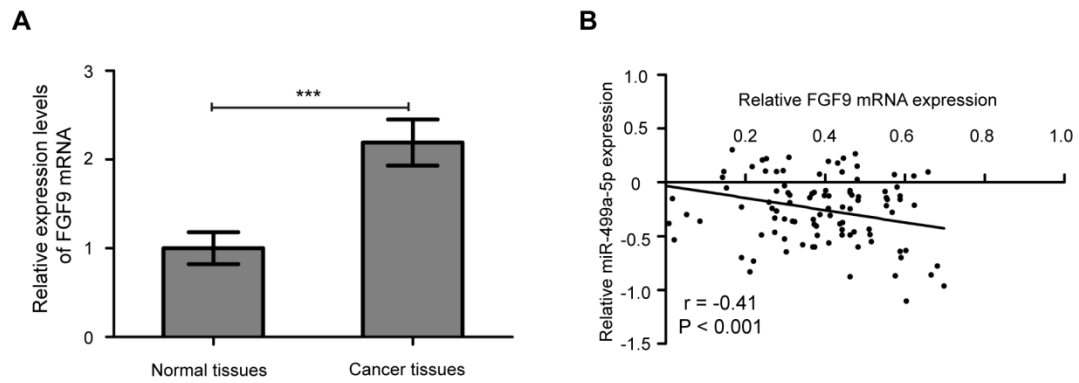

**Figure S3.** Expression of FGF9 in NSCLC samples. (A) RT-qPCR analysis of FGF9 mRNA expression in cancer tissues and matched adjacent normal tissues from NSCLC patients. (B) Spearman's correlation analysis the correlation between miR-499a-5p and FGF9 mRNA expression in tumor specimens. \*\*\* $P < 0.001$ .
